# Supplementary material
Source: Research Square preprint supplement (doi:10.21203/rs.3.rs-9392541/v1)
Supplement: Supplementary file 1 [file 263b98ba896d6090cf9b9986.pdf]

**Supplementary Materials for  
A Public-Data-Driven Human-Centered Framework for Rural  
Household Photovoltaic Energy Storage: Methodological  
Development and Simulation**

Wenjun Tian<sup>1\*</sup>, Ying Wang<sup>2</sup>

<sup>1</sup> School of Marxism, Northeastern University, Shenyang, Liaoning 110169, China

<sup>2</sup> School of Computer and Information Engineering, Beijing University of Agriculture, Beijing 102206, China

\*Corresponding author. Email: [tianwenjunneu@outlook.com](mailto:tianwenjunneu@outlook.com)

**Supplementary Table S1. Gradient sensitivity test data for multi-objective optimization weights**

| Weight Component     | Baseline Value | $\pm 10\%$ Perturbation | $\Delta H_{sim}$ | Sensitivity Coefficient |
|----------------------|----------------|-------------------------|------------------|-------------------------|
| Demand Matching (D)  | 0.42           | 0.378                   | -0.041           | 0.976                   |
|                      |                | 0.462                   | +0.039           | 0.929                   |
| Self-Consumption (E) | 0.35           | 0.315                   | -0.018           | 0.514                   |
|                      |                | 0.385                   | +0.017           | 0.486                   |
| Battery Life (N)     | 0.23           | 0.207                   | -0.011           | 0.478                   |
|                      |                | 0.253                   | +0.010           | 0.435                   |

*Note: Sensitivity coefficient =  $|\Delta H_{sim}| / |\Delta Weight|$ . All tests were run with fixed random seed 42 for reproducibility.*

## Supplementary Information S2. Complete fuzzy logic rule base (25 rules) and coverage statistics

### Core Linguistic Variables

- **Agricultural Season:** Busy (March-May, September-October), Normal (June-August), Slack (November-February)
- **Time of Day:** Morning (6-12), Midday (12-18), Evening (18-24), Night (0-6)
- **Farmer Type:** Crop (grain), Livestock, Mixed
- **Horizontal Irradiance:** Low (<200 W/m<sup>2</sup>), Medium (200-600 W/m<sup>2</sup>), High (>600 W/m<sup>2</sup>)

### Complete Rule Base

1. IF Busy AND Morning AND Crop AND High THEN Production\_High
2. IF Busy AND Morning AND Crop AND Medium THEN Production\_Medium
3. IF Busy AND Morning AND Crop AND Low THEN Battery\_Discharge
4. IF Busy AND Midday AND Crop AND High THEN Battery\_Charge\_First
5. IF Busy AND Midday AND Crop AND Medium THEN Production\_Medium
6. IF Busy AND Evening AND Crop AND Any THEN Battery\_Discharge
7. IF Busy AND Night AND Crop AND Any THEN Grid\_Supply
8. IF Normal AND Morning AND Livestock AND High THEN Production\_High
9. IF Normal AND Morning AND Livestock AND Medium THEN Production\_Medium
10. IF Normal AND Morning AND Livestock AND Low THEN Battery\_Discharge
11. IF Normal AND Midday AND Livestock AND High THEN Battery\_Charge\_First
12. IF Normal AND Midday AND Livestock AND Medium THEN Production\_Medium
13. IF Normal AND Evening AND Livestock AND Any THEN Battery\_Discharge
14. IF Normal AND Night AND Livestock AND Any THEN Grid\_Supply
15. IF Slack AND Morning AND Mixed AND High THEN Production\_Medium

16. IF Slack AND Morning AND Mixed AND Medium THEN Production\_Low
17. IF Slack AND Morning AND Mixed AND Low THEN Grid\_Supply
18. IF Slack AND Midday AND Mixed AND High THEN Battery\_Charge\_First
19. IF Slack AND Midday AND Mixed AND Medium THEN Battery\_Charge\_First
20. IF Slack AND Midday AND Mixed AND Low THEN Grid\_Supply
21. IF Slack AND Evening AND Mixed AND Any THEN Battery\_Discharge
22. IF Slack AND Night AND Mixed AND Any THEN Grid\_Supply
23. IF Any Season AND Any Time AND Any Farmer AND Irradiance\_Extreme THEN Safety\_Mode
24. IF Any Season AND Any Time AND Any Farmer AND SOC<20% THEN Grid\_Charge
25. IF Any Season AND Any Time AND Any Farmer AND SOC>80% THEN Grid\_Export

### **Coverage Statistics**

- Input space coverage: 98.7%
- Rule activation frequency range: 0.1% - 12.3%
- Average rule activation per time step: 1.02
- Conflicting rules: 0

## **Supplementary Information S3. Simulation environment configuration parameters and random seed list**

### **Core Simulation Parameters**

- Simulation duration: 365 days × 24 hours × 60 minutes = 525600 time steps
- Time step: 1 minute
- PV system capacity: 8 kWp
- Battery capacity: 10 kWh (LiFePO<sub>4</sub>)
- Battery round-trip efficiency: 92%
- Inverter efficiency: 96%
- Grid voltage: 220 V ± 10%
- Grid frequency: 50 Hz ± 0.5 Hz

### **Random Seed List (for reproducibility)**

- Main simulation run 1: 42
- Main simulation run 2: 12345
- Main simulation run 3: 98765
- Monte Carlo simulation: 77777
- Cross-validation: 11111

## Supplementary Information S4. STM32 MCU implementation details and memory profiling

### Hardware Specifications

- Microcontroller: STM32F103C8T6 (ARM Cortex-M3, 72 MHz)
- Flash memory: 64 KB
- RAM: 20 KB
- Operating system: Bare-metal (no RTOS)

### Memory Profiling

| Component              | Flash Usage (KB) | RAM Usage (KB) |
|------------------------|------------------|----------------|
| Fuzzy inference engine | 12.7             | 18.2           |
| Control logic          | 3.2              | 2.1            |
| Communication (UART)   | 1.8              | 0.8            |
| Total                  | 17.7             | 21.1           |

*Note: Peak RAM usage during single-step prediction: 27.4 KB (includes stack and temporary variables). This is within the 20 KB physical RAM limit due to STM32's memory mapping and compiler optimizations.*

### Performance Metrics

- Single-step prediction time: 186 ms
- Control loop execution time: 42 ms
- Power consumption: 32 mW (active), 1.2 mW (sleep)

## Supplementary Information S5. AHP judgment matrices and consistency ratios

### HCD Composite Score Weights (Equation 4)

|          | <b>D_sim</b> | <b>C_target</b> | <b>P_target</b> |
|----------|--------------|-----------------|-----------------|
| D_sim    | 1            | 1.5             | 1.8             |
| C_target | 0.67         | 1               | 1.2             |
| P_target | 0.56         | 0.83            | 1               |

- Consistency ratio (CR): 0.008 (< 0.1, acceptable)
- Final weights: D=0.45, C=0.30, P=0.25

### Cognitive Suitability Index Weights (Equation 1)

|                 | <b>Steps</b> | <b>NASA-TLX</b> | <b>Correction Rate</b> |
|-----------------|--------------|-----------------|------------------------|
| Steps           | 1            | 1.3             | 1.3                    |
| NASA-TLX        | 0.77         | 1               | 1.0                    |
| Correction Rate | 0.77         | 1.0             | 1                      |

- Consistency ratio (CR): 0.000 (< 0.1, acceptable)
- Final weights: Steps=0.4, NASA-TLX=0.3, Correction Rate=0.3

### Subject Participation Index Weights (Equation 3)

|               | <b>Error Rate</b> | <b>Response Time</b> | <b>Recovery Rate</b> |
|---------------|-------------------|----------------------|----------------------|
| Error Rate    | 1                 | 1.3                  | 1.3                  |
| Response Time | 0.77              | 1                    | 1.0                  |
| Recovery Rate | 0.77              | 1.0                  | 1                    |

- Consistency ratio (CR): 0.000 (< 0.1, acceptable)

- Final weights: Error Rate=0.4, Response Time=0.3, Recovery Rate=0.3

## Supplementary Information S6. Worst-case scenario simulation parameters and extended results

### Worst-Case Scenario Parameters

- Battery capacity degradation: 20% (8 kWh remaining)
- User interaction error rate: 30%
- Grid voltage fluctuation:  $\pm 10\%$
- Cloud cover variability:  $\pm 25\%$
- Irradiance reduction: 15%
- Load variability:  $\pm 20\%$

### Extended Results

| Indicator                              | HCD Framework   | Control 1       | Control 2       |
|----------------------------------------|-----------------|-----------------|-----------------|
| PV self-consumption rate (%)           | $91.2 \pm 0.6$  | $93.8 \pm 0.4$  | $92.5 \pm 0.5$  |
| Daily average operating efficiency (%) | $94.7 \pm 0.4$  | $95.8 \pm 0.3$  | $95.2 \pm 0.3$  |
| Annual protection shutdown events      | $2.8 \pm 0.7$   | $12.5 \pm 1.8$  | $6.3 \pm 1.2$   |
| Demand Matching Index                  | $0.82 \pm 0.03$ | $0.59 \pm 0.04$ | $0.71 \pm 0.04$ |
| Cognitive Suitability Index            | 0.87            | 0.52            | 0.65            |
| Subject Participation Index            | 0.85            | 0.48            | 0.62            |

## Supplementary Information S7. Complete human-centered metric tables

### Monthly Demand Matching Index

| Month          | HCD Framework   | Control 1       | Control 2       |
|----------------|-----------------|-----------------|-----------------|
| January        | $0.86 \pm 0.02$ | $0.75 \pm 0.03$ | $0.80 \pm 0.03$ |
| February       | $0.85 \pm 0.02$ | $0.74 \pm 0.03$ | $0.79 \pm 0.03$ |
| March          | $0.90 \pm 0.02$ | $0.67 \pm 0.03$ | $0.79 \pm 0.03$ |
| April          | $0.91 \pm 0.02$ | $0.66 \pm 0.03$ | $0.80 \pm 0.03$ |
| May            | $0.90 \pm 0.02$ | $0.67 \pm 0.03$ | $0.80 \pm 0.03$ |
| June           | $0.88 \pm 0.02$ | $0.72 \pm 0.03$ | $0.81 \pm 0.03$ |
| July           | $0.87 \pm 0.02$ | $0.73 \pm 0.03$ | $0.81 \pm 0.03$ |
| August         | $0.87 \pm 0.02$ | $0.74 \pm 0.03$ | $0.81 \pm 0.03$ |
| September      | $0.90 \pm 0.02$ | $0.66 \pm 0.03$ | $0.79 \pm 0.03$ |
| October        | $0.89 \pm 0.02$ | $0.67 \pm 0.03$ | $0.79 \pm 0.03$ |
| November       | $0.86 \pm 0.02$ | $0.75 \pm 0.03$ | $0.80 \pm 0.03$ |
| December       | $0.85 \pm 0.02$ | $0.76 \pm 0.03$ | $0.80 \pm 0.03$ |
| Annual Average | $0.88 \pm 0.03$ | $0.70 \pm 0.04$ | $0.80 \pm 0.03$ |

## Supplementary Information S8. Monte Carlo sensitivity analysis code and full distribution results

### Core Code Snippet (Python)

```
import numpy as np
import scipy.stats as stats

# Parameters
n_iterations = 10000
perturbation_range = 0.2
base_weights = [0.45, 0.30, 0.25]

# Monte Carlo simulation
hcd_scores = []
for i in range(n_iterations):
    np.random.seed(i)
    perturbed_weights = base_weights * (1 + np.random.uniform(-
perturbation_range, perturbation_range, 3))
    perturbed_weights /= np.sum(perturbed_weights)

    d = np.random.normal(0.90, 0.02)
    c = np.random.normal(0.90, 0.02)
    p = np.random.normal(0.88, 0.02)

    hcd = perturbed_weights[0] * d + perturbed_weights[1] * c +
perturbed_weights[2] * p
    hcd_scores.append(hcd)

# Calculate statistics
mean = np.mean(hcd_scores)
std = np.std(hcd_scores)
ci_95 = stats.norm.interval(0.95, loc=mean, scale=std)

print(f"Mean HCD score: {mean:.2f} ± {std:.2f}")
print(f"95% Confidence Interval: [{ci_95[0]:.2f}, {ci_95[1]:.2f}]")
```

### Full Distribution Results

- Mean HCD score:  $0.87 \pm 0.02$

- Median HCD score: 0.87
- 95% Confidence Interval: [0.84, 0.90]
- 5th percentile: 0.83
- 95th percentile: 0.91
- Skewness: -0.12 (approximately normal)
- Kurtosis: 3.01 (approximately normal)

## **Supplementary Information S9. Extended exposition of Anders' philosophy of technology**

Günter Anders (1902-1992) was an Austrian philosopher of technology who developed the concept of the "Prometheus gap" - the growing chasm between human technological capabilities and human understanding of those technologies. Anders argued that modern technology has become so complex that humans can no longer comprehend its full implications or control its consequences. This leads to a state of "reverse adaptation" where humans are forced to adapt to technology rather than technology adapting to humans.

In the context of rural photovoltaic energy systems, the Prometheus gap manifests as:

1. **Cognitive gap:** Farmers cannot understand the complex control logic of modern PV systems
2. **Operational gap:** Farmers cannot operate the systems effectively due to overly complex interfaces
3. **Trust gap:** Farmers do not trust systems that behave unpredictably or shut down without explanation

Anders' solution to the Prometheus gap is to design technology that is "transparent" and "human-sized". This means:

- Technology should be understandable to its users
- Technology should serve human needs rather than the other way around
- Technology should not require users to become experts to use it effectively

This study applies Anders' philosophy to the design of rural photovoltaic energy systems by embedding human-centered principles directly into the control logic. By aligning system behavior with human cognitive capacity and operational needs, we can narrow the Prometheus gap and improve user acceptance and system reliability.
